# Supplementary material for: Soluble Epoxide Hydrolase Inhibition by t-TUCB Promotes Brown Adipogenesis and Reduces Serum Triglycerides in Diet-Induced Obesity
Source: MDPI journal article supplement (doi:10.3390/ijms21197039), 2020-09-24
Supplement: s1 [file s1]

| Media sample                           | Unit: nmol/L |           |           |         |         |            |            |          |          |
|----------------------------------------|--------------|-----------|-----------|---------|---------|------------|------------|----------|----------|
|                                        | ARA          |           |           |         |         |            |            |          |          |
|                                        | CYPs         |           |           |         |         | SEH        |            |          |          |
| Group Info.                            | Sample ID    | 14,15-EET | 11,12-EET | 8,9-EET | 5,6-EET | 14,15-DHET | 11,12-DHET | 8,9-DHET | 5,6-DHET |
| Murine Brown Pre-adipocytes            | 12h sample 1 | 0.081     | 0.060     | 0.173   | 0.827   | 0.213      | 0.117      | 0.050    | 0.060    |
|                                        | 12h sample 2 | 0.123     | 0.174     | 0.240   | 0.800   | 0.208      | 0.122      | 0.056    | 0.073    |
|                                        | 12h sample 3 | 0.117     | 0.193     | 0.291   | 0.773   | 0.212      | 0.126      | 0.044    | 0.088    |
|                                        | Ave          | 0.107     | 0.142     | 0.235   | 0.800   | 0.211      | 0.121      | 0.050    | 0.074    |
|                                        | SE           | 0.013     | 0.041     | 0.034   | 0.015   | 0.002      | 0.003      | 0.003    | 0.008    |
|                                        | 24h sample 1 | 0.077     | 0.116     | 0.149   | 0.400   | 0.276      | 0.119      | 0.044    | 0.048    |
|                                        | 24h sample 2 | 0.105     | 0.106     | 0.136   | 0.353   | 0.273      | 0.111      | 0.045    | 0.055    |
|                                        | 24h sample 3 | 0.063     | 0.080     | 0.131   | 0.284   | 0.256      | 0.118      | 0.030    | 0.049    |
|                                        | Ave          | 0.082     | 0.101     | 0.139   | 0.346   | 0.269      | 0.116      | 0.040    | 0.051    |
|                                        | SE           | 0.012     | 0.011     | 0.005   | 0.034   | 0.006      | 0.002      | 0.005    | 0.002    |
|                                        | 48h sample 1 | 0.066     | 0.092     | 0.073   | 0.254   | 0.377      | 0.109      | 0.023    | 0.035    |
|                                        | 48h sample 2 | 0.075     | 0.109     | 0.113   | 0.201   | 0.367      | 0.107      | 0.026    | 0.048    |
|                                        | 48h sample 3 | 0.136     | 0.195     | 0.163   | 0.473   | 0.353      | 0.119      | 0.027    | 0.052    |
|                                        | Ave          | 0.092     | 0.132     | 0.116   | 0.310   | 0.366      | 0.112      | 0.025    | 0.045    |
|                                        | SE           | 0.022     | 0.032     | 0.026   | 0.083   | 0.007      | 0.004      | 0.001    | 0.005    |
| Murine Differentiated Brown Adipocytes | 12h sample 1 | 0.080     | 0.178     | 0.268   | 0.820   | 0.237      | 0.140      | 0.080    | 0.075    |
|                                        | 12h sample 2 | 0.108     | 0.163     | 0.201   | 1.283   | 0.223      | 0.139      | 0.094    | 0.080    |
|                                        | 12h sample 3 | 0.105     | 0.163     | 0.249   | 0.783   | 0.230      | 0.154      | 0.078    | 0.108    |
|                                        | Ave          | 0.098     | 0.168     | 0.239   | 0.962   | 0.230      | 0.144      | 0.084    | 0.087    |
|                                        | SE           | 0.009     | 0.005     | 0.020   | 0.161   | 0.004      | 0.005      | 0.005    | 0.010    |
|                                        | 24h sample 1 | 0.068     | 0.104     | 0.150   | 0.693   | 0.236      | 0.156      | 0.055    | 0.034    |
|                                        | 24h sample 2 | 0.105     | 0.182     | 0.195   | 0.740   | 0.232      | 0.157      | 0.080    | 0.062    |
|                                        | 24h sample 3 | 0.156     | 0.265     | 0.231   | 1.183   | 0.210      | 0.144      | 0.052    | 0.052    |
|                                        | Ave          | 0.110     | 0.184     | 0.192   | 0.872   | 0.226      | 0.153      | 0.062    | 0.049    |
|                                        | SE           | 0.025     | 0.047     | 0.023   | 0.156   | 0.008      | 0.004      | 0.009    | 0.008    |
|                                        | 48h sample 1 | 0.092     | 0.387     | 0.343   | 1.183   | 0.353      | 0.229      | 0.088    | 0.066    |
|                                        | 48h sample 2 | 0.112     | 0.152     | 0.194   | 0.803   | 0.262      | 0.206      | 0.068    | 0.055    |
|                                        | 48h sample 3 | 0.133     | 0.186     | 0.181   | 0.973   | 0.231      | 0.178      | 0.078    | 0.024    |
|                                        | Ave          | 0.112     | 0.242     | 0.239   | 0.987   | 0.282      | 0.204      | 0.078    | 0.049    |
|                                        | SE           | 0.012     | 0.073     | 0.052   | 0.110   | 0.037      | 0.015      | 0.006    | 0.013    |
| Human Brown Pre-adipocytes             | 12h sample 1 | 0.073     | 0.144     | 0.202   | 0.587   | 0.112      | 0.089      | 0.050    | 0.154    |
|                                        | 12h sample 2 | 0.089     | 0.084     | 0.261   | 0.580   | 0.095      | 0.070      | 0.046    | 0.125    |
|                                        | 12h sample 3 | 0.078     | 0.105     | 0.245   | 0.647   | 0.107      | 0.083      | 0.053    | 0.160    |
|                                        | Ave          | 0.080     | 0.111     | 0.236   | 0.604   | 0.105      | 0.081      | 0.050    | 0.146    |
|                                        | SE           | 0.005     | 0.018     | 0.017   | 0.021   | 0.005      | 0.006      | 0.002    | 0.011    |
|                                        | 24h sample 1 | 0.059     | 0.097     | 0.142   | 0.203   | 0.126      | 0.076      | 0.032    | 0.081    |
|                                        | 24h sample 2 | 0.057     | 0.078     | 0.142   | 0.337   | 0.109      | 0.068      | 0.033    | 0.069    |
|                                        | 24h sample 3 | 0.052     | 0.100     | 0.108   | 0.140   | 0.126      | 0.081      | 0.046    | 0.096    |
|                                        | Ave          | 0.056     | 0.092     | 0.131   | 0.227   | 0.120      | 0.075      | 0.037    | 0.082    |
|                                        | SE           | 0.002     | 0.007     | 0.011   | 0.058   | 0.006      | 0.004      | 0.004    | 0.008    |
|                                        | 48h sample 1 | 0.038     | 0.057     | 0.079   | 0.113   | 0.147      | 0.069      | 0.014    | 0.036    |
|                                        | 48h sample 2 | 0.036     | 0.030     | 0.066   | 0.020   | 0.154      | 0.048      | 0.021    | 0.030    |
|                                        | 48h sample 3 | 0.019     | 0.035     | 0.062   | 0.091   | 0.131      | 0.061      | 0.009    | 0.022    |
|                                        | Ave          | 0.031     | 0.041     | 0.069   | 0.075   | 0.144      | 0.059      | 0.015    | 0.029    |
|                                        | SE           | 0.006     | 0.008     | 0.005   | 0.028   | 0.007      | 0.006      | 0.004    | 0.004    |
| Human Differentiated Brown Adipocytes  | 12h sample 1 | 0.047     | 0.131     | 0.080   | 0.154   | 0.095      | 0.038      | 0.025    | 0.039    |
|                                        | 12h sample 2 | 0.044     | 0.061     | 0.094   | 0.056   | 0.095      | 0.035      | 0.016    | 0.036    |
|                                        | 12h sample 3 | 0.027     | 0.045     | 0.054   | 0.174   | 0.081      | 0.017      | 0.018    | 0.025    |
|                                        | Ave          | 0.039     | 0.079     | 0.076   | 0.128   | 0.090      | 0.030      | 0.020    | 0.033    |
|                                        | SE           | 0.006     | 0.026     | 0.012   | 0.037   | 0.005      | 0.007      | 0.003    | 0.004    |
|                                        | 24h sample 1 | 0.051     | 0.020     | 0.097   | 0.198   | 0.103      | 0.071      | 0.009    | 0.019    |
|                                        | 24h sample 2 | 0.056     | 0.155     | 0.107   | 0.240   | 0.131      | 0.074      | 0.023    | 0.057    |
|                                        | 24h sample 3 | 0.078     | 0.077     | 0.086   | 0.273   | 0.133      | 0.078      | 0.018    | 0.036    |
|                                        | Ave          | 0.062     | 0.084     | 0.097   | 0.237   | 0.122      | 0.075      | 0.017    | 0.037    |
|                                        | SE           | 0.008     | 0.039     | 0.006   | 0.022   | 0.010      | 0.002      | 0.004    | 0.011    |
|                                        | 48h sample 1 | 0.084     | 0.143     | 0.137   | 0.224   | 0.115      | 0.075      | 0.030    | 0.041    |
|                                        | 48h sample 2 | 0.062     | 0.086     | 0.107   | 0.190   | 0.112      | 0.061      | 0.018    | 0.041    |
|                                        | 48h sample 3 | 0.053     | 0.100     | 0.079   | 0.297   | 0.107      | 0.065      | 0.053    | 0.035    |
|                                        | Ave          | 0.067     | 0.110     | 0.108   | 0.237   | 0.111      | 0.067      | 0.034    | 0.039    |
|                                        | SE           | 0.009     | 0.017     | 0.017   | 0.032   | 0.002      | 0.004      | 0.010    | 0.002    |

| Media sample                           | Unit: nmol/L |             |            |              |             |
|----------------------------------------|--------------|-------------|------------|--------------|-------------|
|                                        | LA           | CYPs        |            | SEH          |             |
| Group Info.                            | Sample ID    | 12,13-EpOME | 9,10-EpOME | 12,13-DiHOME | 9,10-DiHOME |
| Murine Brown Pre-adipocytes            | 12h sample 1 | 2.007       | 0.533      | 2.103        | 1.950       |
|                                        | 12h sample 2 | 2.460       | 0.807      | 2.153        | 1.897       |
|                                        | 12h sample 3 | 2.713       | 0.943      | 2.190        | 1.947       |
|                                        | Ave          | 2.393       | 0.761      | 2.149        | 1.931       |
|                                        | SE           | 0.207       | 0.121      | 0.025        | 0.017       |
|                                        | 24h sample 1 | 1.780       | 0.460      | 1.980        | 0.950       |
|                                        | 24h sample 2 | 1.683       | 0.423      | 1.920        | 0.900       |
|                                        | 24h sample 3 | 1.607       | 0.311      | 1.987        | 0.953       |
|                                        | Ave          | 1.690       | 0.398      | 1.962        | 0.934       |
|                                        | SE           | 0.050       | 0.045      | 0.021        | 0.017       |
|                                        | 48h sample 1 | 0.933       | 0.340      | 1.230        | 0.204       |
|                                        | 48h sample 2 | 0.963       | 0.383      | 1.200        | 0.235       |
|                                        | 48h sample 3 | 1.320       | 0.580      | 1.267        | 0.252       |
|                                        | Ave          | 1.072       | 0.434      | 1.232        | 0.230       |
|                                        | SE           | 0.124       | 0.074      | 0.019        | 0.014       |
| Murine Differentiated Brown Adipocytes | 12h sample 1 | 1.053       | 0.370      | 2.037        | 1.807       |
|                                        | 12h sample 2 | 0.953       | 0.271      | 1.750        | 1.770       |
|                                        | 12h sample 3 | 0.870       | 0.316      | 2.050        | 2.017       |
|                                        | Ave          | 0.959       | 0.319      | 1.946        | 1.864       |
|                                        | SE           | 0.053       | 0.029      | 0.098        | 0.077       |
|                                        | 24h sample 1 | 0.315       | 0.146      | 0.993        | 0.570       |
|                                        | 24h sample 2 | 0.540       | 0.272      | 1.053        | 0.723       |
|                                        | 24h sample 3 | 0.760       | 0.393      | 0.963        | 0.650       |
|                                        | Ave          | 0.538       | 0.271      | 1.003        | 0.648       |
|                                        | SE           | 0.128       | 0.071      | 0.026        | 0.044       |
|                                        | 48h sample 1 | 0.787       | 0.503      | 0.880        | 0.383       |
|                                        | 48h sample 2 | 0.460       | 0.326      | 0.673        | 0.343       |
|                                        | 48h sample 3 | 0.353       | 0.244      | 0.527        | 0.197       |
|                                        | Ave          | 0.533       | 0.358      | 0.693        | 0.308       |
|                                        | SE           | 0.130       | 0.077      | 0.102        | 0.057       |
| Human Brown Pre-adipocytes             | 12h sample 1 | 0.820       | 0.383      | 1.823        | 1.347       |
|                                        | 12h sample 2 | 0.720       | 0.287      | 1.673        | 1.193       |
|                                        | 12h sample 3 | 0.693       | 0.291      | 1.763        | 1.273       |
|                                        | Ave          | 0.744       | 0.321      | 1.753        | 1.271       |
|                                        | SE           | 0.039       | 0.031      | 0.044        | 0.044       |
|                                        | 24h sample 1 | 0.723       | 0.257      | 1.627        | 0.610       |
|                                        | 24h sample 2 | 0.727       | 0.393      | 1.393        | 0.553       |
|                                        | 24h sample 3 | 0.727       | 0.320      | 1.577        | 0.610       |
|                                        | Ave          | 0.726       | 0.324      | 1.532        | 0.591       |
|                                        | SE           | 0.001       | 0.039      | 0.071        | 0.019       |
|                                        | 48h sample 1 | 0.617       | 0.331      | 1.040        | 0.102       |
|                                        | 48h sample 2 | 0.350       | 0.193      | 0.907        | 0.089       |
|                                        | 48h sample 3 | 0.324       | 0.128      | 0.850        | 0.083       |
|                                        | Ave          | 0.430       | 0.217      | 0.932        | 0.091       |
|                                        | SE           | 0.094       | 0.060      | 0.056        | 0.006       |
| Human Differentiated Brown Adipocytes  | 12h sample 1 | 0.560       | 0.493      | 0.180        | 0.087       |
|                                        | 12h sample 2 | 0.337       | 0.299      | 0.120        | 0.082       |
|                                        | 12h sample 3 | 0.257       | 0.174      | 0.087        | 0.036       |
|                                        | Ave          | 0.385       | 0.322      | 0.129        | 0.068       |
|                                        | SE           | 0.091       | 0.093      | 0.027        | 0.016       |
|                                        | 24h sample 1 | 0.150       | 0.088      | 0.299        | 0.091       |
|                                        | 24h sample 2 | 0.453       | 0.327      | 0.357        | 0.161       |
|                                        | 24h sample 3 | 0.460       | 0.296      | 0.370        | 0.178       |
|                                        | Ave          | 0.354       | 0.237      | 0.342        | 0.143       |
|                                        | SE           | 0.102       | 0.075      | 0.022        | 0.027       |
|                                        | 48h sample 1 | 0.557       | 0.357      | 0.463        | 0.227       |
|                                        | 48h sample 2 | 0.360       | 0.215      | 0.383        | 0.168       |
|                                        | 48h sample 3 | 0.330       | 0.218      | 0.383        | 0.159       |
|                                        | Ave          | 0.415       | 0.263      | 0.410        | 0.185       |
|                                        | SE           | 0.071       | 0.047      | 0.027        | 0.021       |

| Media sample                           | Unit: nmol/L |              |             |              |              |             |              |
|----------------------------------------|--------------|--------------|-------------|--------------|--------------|-------------|--------------|
|                                        | ALA          | CYPs         |             |              | SEH          |             |              |
| Group Info.                            | Sample ID    | 15(16)-EpODE | 9(10)-EpODE | 12(13)-EpODE | 15,16-DiHODE | 9,10-DiHODE | 12,13-DiHODE |
| Murine Brown Pre-adipocytes            | 12h sample 1 | 0.160        | 0.025       | 0.019        | 1.570        | 0.205       | 0.058        |
|                                        | 12h sample 2 | 0.177        | 0.038       | 0.034        | 1.507        | 0.221       | 0.083        |
|                                        | 12h sample 3 | 0.252        | 0.042       | 0.038        | 1.227        | 0.166       | 0.059        |
|                                        | Ave          | 0.197        | 0.035       | 0.031        | 1.434        | 0.197       | 0.067        |
|                                        | SE           | 0.028        | 0.005       | 0.006        | 0.105        | 0.016       | 0.008        |
|                                        | 24h sample 1 | 0.184        | 0.042       | 0.033        | 1.787        | 0.153       | 0.064        |
|                                        | 24h sample 2 | 0.141        | 0.020       | 0.031        | 1.600        | 0.134       | 0.087        |
|                                        | 24h sample 3 | 0.160        | 0.025       | 0.017        | 1.440        | 0.096       | 0.049        |
|                                        | Ave          | 0.162        | 0.029       | 0.027        | 1.609        | 0.127       | 0.067        |
|                                        | SE           | 0.012        | 0.007       | 0.005        | 0.100        | 0.017       | 0.011        |
|                                        | 48h sample 1 | 0.084        | 0.032       | 0.022        | 1.157        | 0.035       | 0.038        |
|                                        | 48h sample 2 | 0.080        | 0.023       | 0.018        | 1.060        | 0.032       | 0.040        |
|                                        | 48h sample 3 | 0.142        | 0.041       | 0.020        | 1.217        | 0.051       | 0.050        |
|                                        | Ave          | 0.102        | 0.032       | 0.020        | 1.144        | 0.039       | 0.043        |
|                                        | SE           | 0.020        | 0.005       | 0.001        | 0.046        | 0.006       | 0.004        |
| Murine Differentiated Brown Adipocytes | 12h sample 1 | 0.131        | 0.021       | 0.016        | 1.380        | 0.133       | 0.052        |
|                                        | 12h sample 2 | 0.084        | 0.021       | 0.026        | 1.640        | 0.143       | 0.070        |
|                                        | 12h sample 3 | 0.161        | 0.015       | 0.027        | 1.520        | 0.153       | 0.056        |
|                                        | Ave          | 0.125        | 0.019       | 0.023        | 1.513        | 0.143       | 0.059        |
|                                        | SE           | 0.022        | 0.002       | 0.003        | 0.075        | 0.006       | 0.006        |
|                                        | 24h sample 1 | 0.055        | 0.008       | 0.004        | 1.763        | 0.061       | 0.051        |
|                                        | 24h sample 2 | 0.070        | 0.023       | 0.003        | 1.537        | 0.069       | 0.045        |
|                                        | 24h sample 3 | 0.102        | 0.038       | 0.028        | 1.900        | 0.093       | 0.100        |
|                                        | Ave          | 0.076        | 0.023       | 0.012        | 1.733        | 0.074       | 0.065        |
|                                        | SE           | 0.014        | 0.009       | 0.008        | 0.106        | 0.010       | 0.018        |
|                                        | 48h sample 1 | 0.124        | 0.053       | 0.010        | 2.150        | 0.047       | 0.048        |
|                                        | 48h sample 2 | 0.102        | 0.024       | 0.018        | 1.613        | 0.057       | 0.080        |
|                                        | 48h sample 3 | 0.050        | 0.014       | 0.014        | 1.417        | 0.018       | 0.021        |
|                                        | Ave          | 0.092        | 0.031       | 0.014        | 1.727        | 0.041       | 0.049        |
|                                        | SE           | 0.022        | 0.012       | 0.003        | 0.219        | 0.012       | 0.017        |
| Human Brown Pre-adipocytes             | 12h sample 1 | 0.147        | 0.020       | 0.029        | 0.930        | 0.142       | 0.055        |
|                                        | 12h sample 2 | 0.122        | 0.022       | 0.023        | 0.847        | 0.093       | 0.053        |
|                                        | 12h sample 3 | 0.136        | 0.020       | 0.018        | 1.000        | 0.136       | 0.051        |
|                                        | Ave          | 0.135        | 0.021       | 0.023        | 0.926        | 0.124       | 0.053        |
|                                        | SE           | 0.007        | 0.001       | 0.003        | 0.044        | 0.015       | 0.001        |
|                                        | 24h sample 1 | 0.096        | 0.015       | 0.016        | 0.970        | 0.090       | 0.061        |
|                                        | 24h sample 2 | 0.109        | 0.040       | 0.019        | 0.800        | 0.066       | 0.056        |
|                                        | 24h sample 3 | 0.124        | 0.034       | 0.024        | 0.900        | 0.083       | 0.078        |
|                                        | Ave          | 0.110        | 0.030       | 0.020        | 0.890        | 0.079       | 0.065        |
|                                        | SE           | 0.008        | 0.008       | 0.002        | 0.049        | 0.007       | 0.007        |
|                                        | 48h sample 1 | 0.083        | 0.021       | 0.021        | 0.850        | 0.052       | 0.030        |
|                                        | 48h sample 2 | 0.055        | 0.017       | 0.004        | 0.767        | 0.008       | 0.018        |
|                                        | 48h sample 3 | 0.048        | 0.017       | 0.012        | 0.877        | 0.021       | 0.041        |
|                                        | Ave          | 0.062        | 0.018       | 0.013        | 0.831        | 0.027       | 0.029        |
|                                        | SE           | 0.011        | 0.001       | 0.005        | 0.033        | 0.013       | 0.007        |
| Human Differentiated Brown Adipocytes  | 12h sample 1 | 0.115        | 0.032       | 0.021        | 0.510        | 0.022       | 0.032        |
|                                        | 12h sample 2 | 0.061        | 0.020       | 0.016        | 0.743        | 0.021       | 0.011        |
|                                        | 12h sample 3 | 0.017        | 0.017       | 0.003        | 0.580        | 0.001       | 0.022        |
|                                        | Ave          | 0.064        | 0.023       | 0.013        | 0.611        | 0.015       | 0.022        |
|                                        | SE           | 0.028        | 0.005       | 0.005        | 0.069        | 0.007       | 0.006        |
|                                        | 24h sample 1 | 0.015        | 0.005       | 0.007        | 0.620        | 0.006       | 0.012        |
|                                        | 24h sample 2 | 0.078        | 0.015       | 0.008        | 0.823        | 0.044       | 0.014        |
|                                        | 24h sample 3 | 0.059        | 0.028       | 0.013        | 0.697        | 0.024       | 0.035        |
|                                        | Ave          | 0.051        | 0.016       | 0.010        | 0.713        | 0.025       | 0.021        |
|                                        | SE           | 0.019        | 0.007       | 0.002        | 0.059        | 0.011       | 0.007        |
|                                        | 48h sample 1 | 0.064        | 0.026       | 0.013        | 0.793        | 0.041       | 0.063        |
|                                        | 48h sample 2 | 0.054        | 0.014       | 0.008        | 0.790        | 0.026       | 0.027        |
|                                        | 48h sample 3 | 0.029        | 0.010       | 0.008        | 0.767        | 0.023       | 0.045        |
|                                        | Ave          | 0.049        | 0.016       | 0.009        | 0.783        | 0.030       | 0.045        |
|                                        | SE           | 0.010        | 0.005       | 0.002        | 0.008        | 0.006       | 0.011        |

| Media sample                           | Unit: nmol/L |              |              |              |            |              |              |              |            |            |
|----------------------------------------|--------------|--------------|--------------|--------------|------------|--------------|--------------|--------------|------------|------------|
| Group Info.                            | Sample ID    | CYPs         |              |              |            | SEH          |              |              |            |            |
|                                        |              | 17(18)-EpETE | 14(15)-EpETE | 11(12)-EpETE | 8(9)-EpETE | 17,18-DIHETE | 14,15-DIHETE | 11,12-DIHETE | 8,9-DIHETE | 5,6-DIHETE |
| Murine Brown Pre-adipocytes            | 12h sample 1 | 0.037        | #VALUE!      | #VALUE!      | #VALUE!    | 2.187        | 0.075        | 0.036        | 0.104      | 0.009      |
|                                        | 12h sample 2 | 0.068        | #VALUE!      | #VALUE!      | #VALUE!    | 1.993        | 0.063        | 0.036        | 0.095      | 0.005      |
|                                        | 12h sample 3 | 0.037        | #VALUE!      | #VALUE!      | #VALUE!    | 1.703        | 0.068        | 0.034        | 0.090      | 0.011      |
|                                        | Ave          | 0.047        | #VALUE!      | #VALUE!      | #VALUE!    | 1.961        | 0.069        | 0.035        | 0.096      | 0.009      |
|                                        | SE           | 0.010        | #VALUE!      | #VALUE!      | #VALUE!    | 0.140        | 0.003        | 0.001        | 0.004      | 0.002      |
|                                        | 24h sample 1 | 0.060        | #VALUE!      | #VALUE!      | #VALUE!    | 2.757        | 0.091        | 0.041        | 0.100      | 0.007      |
|                                        | 24h sample 2 | 0.046        | #VALUE!      | #VALUE!      | #VALUE!    | 2.413        | 0.084        | 0.030        | 0.069      | 0.006      |
|                                        | 24h sample 3 | 0.074        | #VALUE!      | #VALUE!      | #VALUE!    | 2.117        | 0.079        | 0.032        | 0.081      | 0.006      |
|                                        | Ave          | 0.060        | #VALUE!      | #VALUE!      | #VALUE!    | 2.429        | 0.084        | 0.034        | 0.083      | 0.007      |
|                                        | SE           | 0.008        | #VALUE!      | #VALUE!      | #VALUE!    | 0.185        | 0.003        | 0.003        | 0.009      | 0.000      |
|                                        | 48h sample 1 | 0.030        | #VALUE!      | #VALUE!      | #VALUE!    | 3.090        | 0.138        | 0.045        | 0.031      | 0.006      |
|                                        | 48h sample 2 | 0.048        | #VALUE!      | #VALUE!      | #VALUE!    | 2.757        | 0.130        | 0.043        | 0.030      | 0.006      |
|                                        | 48h sample 3 | 0.047        | #VALUE!      | #VALUE!      | #VALUE!    | 2.980        | 0.131        | 0.045        | 0.044      | 0.005      |
|                                        | Ave          | 0.042        | #VALUE!      | #VALUE!      | #VALUE!    | 2.942        | 0.133        | 0.044        | 0.035      | 0.005      |
|                                        | SE           | 0.006        | #VALUE!      | #VALUE!      | #VALUE!    | 0.098        | 0.003        | 0.001        | 0.005      | 0.000      |
| Murine Differentiated Brown Adipocytes | 12h sample 1 | 0.090        | #VALUE!      | #VALUE!      | #VALUE!    | 2.337        | 0.089        | 0.044        | 0.092      | 0.012      |
|                                        | 12h sample 2 | 0.035        | #VALUE!      | #VALUE!      | #VALUE!    | 2.940        | 0.088        | 0.038        | 0.111      | 0.010      |
|                                        | 12h sample 3 | 0.053        | #VALUE!      | #VALUE!      | #VALUE!    | 2.503        | 0.091        | 0.040        | 0.109      | 0.014      |
|                                        | Ave          | 0.059        | #VALUE!      | #VALUE!      | #VALUE!    | 2.593        | 0.089        | 0.041        | 0.104      | 0.012      |
|                                        | SE           | 0.016        | #VALUE!      | #VALUE!      | #VALUE!    | 0.180        | 0.001        | 0.002        | 0.006      | 0.001      |
|                                        | 24h sample 1 | 0.036        | #VALUE!      | #VALUE!      | #VALUE!    | 3.967        | 0.114        | 0.047        | 0.071      | 0.011      |
|                                        | 24h sample 2 | 0.084        | #VALUE!      | #VALUE!      | #VALUE!    | 3.290        | 0.103        | 0.038        | 0.089      | 0.015      |
|                                        | 24h sample 3 | 0.086        | #VALUE!      | #VALUE!      | #VALUE!    | 3.800        | 0.090        | 0.036        | 0.076      | 0.005      |
|                                        | Ave          | 0.069        | #VALUE!      | #VALUE!      | #VALUE!    | 3.686        | 0.102        | 0.040        | 0.079      | 0.010      |
|                                        | SE           | 0.016        | #VALUE!      | #VALUE!      | #VALUE!    | 0.204        | 0.007        | 0.004        | 0.005      | 0.003      |
|                                        | 48h sample 1 | 0.194        | #VALUE!      | #VALUE!      | #VALUE!    | 6.500        | 0.173        | 0.070        | 0.075      | 0.007      |
|                                        | 48h sample 2 | 0.113        | #VALUE!      | #VALUE!      | #VALUE!    | 4.700        | 0.118        | 0.052        | 0.062      | 0.009      |
|                                        | 48h sample 3 | 0.040        | #VALUE!      | #VALUE!      | #VALUE!    | 4.533        | 0.123        | 0.049        | 0.058      | 0.009      |
|                                        | Ave          | 0.116        | #VALUE!      | #VALUE!      | #VALUE!    | 5.244        | 0.138        | 0.057        | 0.065      | 0.008      |
|                                        | SE           | 0.044        | #VALUE!      | #VALUE!      | #VALUE!    | 0.630        | 0.018        | 0.006        | 0.005      | 0.001      |
| Human Brown Pre-adipocytes             | 12h sample 1 | 0.107        | #VALUE!      | #VALUE!      | #VALUE!    | 1.210        | 0.032        | 0.013        | 0.065      | 0.007      |
|                                        | 12h sample 2 | 0.067        | #VALUE!      | #VALUE!      | #VALUE!    | 1.060        | 0.026        | 0.017        | 0.046      | 0.011      |
|                                        | 12h sample 3 | 0.083        | #VALUE!      | #VALUE!      | #VALUE!    | 1.277        | 0.026        | 0.021        | 0.039      | 0.008      |
|                                        | Ave          | 0.086        | #VALUE!      | #VALUE!      | #VALUE!    | 1.182        | 0.028        | 0.017        | 0.050      | 0.008      |
|                                        | SE           | 0.012        | #VALUE!      | #VALUE!      | #VALUE!    | 0.064        | 0.002        | 0.002        | 0.008      | 0.001      |
|                                        | 24h sample 1 | 0.093        | #VALUE!      | #VALUE!      | #VALUE!    | 1.247        | 0.028        | 0.021        | 0.039      | 0.007      |
|                                        | 24h sample 2 | 0.114        | #VALUE!      | #VALUE!      | #VALUE!    | 0.900        | 0.027        | 0.022        | 0.038      | 0.012      |
|                                        | 24h sample 3 | 0.040        | #VALUE!      | #VALUE!      | #VALUE!    | 1.007        | 0.025        | 0.024        | 0.038      | 0.006      |
|                                        | Ave          | 0.083        | #VALUE!      | #VALUE!      | #VALUE!    | 1.051        | 0.027        | 0.022        | 0.038      | 0.008      |
|                                        | SE           | 0.022        | #VALUE!      | #VALUE!      | #VALUE!    | 0.103        | 0.001        | 0.001        | 0.000      | 0.002      |
|                                        | 48h sample 1 | 0.061        | #VALUE!      | #VALUE!      | #VALUE!    | 1.233        | 0.041        | 0.017        | 0.013      | 0.009      |
|                                        | 48h sample 2 | 0.036        | #VALUE!      | #VALUE!      | #VALUE!    | 1.113        | 0.035        | 0.022        | 0.022      | 0.007      |
|                                        | 48h sample 3 | 0.020        | #VALUE!      | #VALUE!      | #VALUE!    | 1.213        | 0.030        | 0.030        | 0.024      | 0.007      |
|                                        | Ave          | 0.039        | #VALUE!      | #VALUE!      | #VALUE!    | 1.187        | 0.035        | 0.023        | 0.020      | 0.008      |
|                                        | SE           | 0.012        | #VALUE!      | #VALUE!      | #VALUE!    | 0.037        | 0.003        | 0.004        | 0.003      | 0.001      |
| Human Differentiated Brown Adipocytes  | 12h sample 1 | 0.031        | #VALUE!      | #VALUE!      | #VALUE!    | 0.820        | 0.027        | 0.011        | 0.008      | 0.006      |
|                                        | 12h sample 2 | 0.025        | #VALUE!      | #VALUE!      | #VALUE!    | 1.063        | 0.017        | 0.010        | 0.022      | 0.004      |
|                                        | 12h sample 3 | 0.018        | #VALUE!      | #VALUE!      | #VALUE!    | 0.957        | 0.020        | 0.011        | 0.018      | 0.004      |
|                                        | Ave          | 0.025        | #VALUE!      | #VALUE!      | #VALUE!    | 0.947        | 0.021        | 0.011        | 0.016      | 0.005      |
|                                        | SE           | 0.004        | #VALUE!      | #VALUE!      | #VALUE!    | 0.070        | 0.003        | 0.000        | 0.004      | 0.000      |
|                                        | 24h sample 1 | 0.025        | #VALUE!      | #VALUE!      | #VALUE!    | 0.850        | 0.024        | 0.006        | 0.011      | 0.004      |
|                                        | 24h sample 2 | 0.105        | #VALUE!      | #VALUE!      | #VALUE!    | 0.957        | 0.027        | 0.009        | 0.013      | 0.010      |
|                                        | 24h sample 3 | 0.060        | #VALUE!      | #VALUE!      | #VALUE!    | 0.843        | 0.034        | 0.015        | 0.023      | 0.007      |
|                                        | Ave          | 0.063        | #VALUE!      | #VALUE!      | #VALUE!    | 0.883        | 0.028        | 0.010        | 0.015      | 0.007      |
|                                        | SE           | 0.023        | #VALUE!      | #VALUE!      | #VALUE!    | 0.037        | 0.003        | 0.003        | 0.004      | 0.002      |
|                                        | 48h sample 1 | 0.043        | #VALUE!      | #VALUE!      | #VALUE!    | 0.983        | 0.020        | 0.011        | 0.016      | 0.007      |
|                                        | 48h sample 2 | 0.043        | #VALUE!      | #VALUE!      | #VALUE!    | 0.933        | 0.028        | 0.014        | 0.014      | 0.009      |
|                                        | 48h sample 3 | 0.033        | #VALUE!      | #VALUE!      | #VALUE!    | 0.887        | 0.020        | 0.008        | 0.018      | 0.009      |
|                                        | Ave          | 0.040        | #VALUE!      | #VALUE!      | #VALUE!    | 0.934        | 0.023        | 0.011        | 0.016      | 0.008      |
|                                        | SE           | 0.003        | #VALUE!      | #VALUE!      | #VALUE!    | 0.028        | 0.003        | 0.002        | 0.001      | 0.001      |

| Media sample                           | Unit: nmol/L |              |              |              |              |            |              |              |              |              |            |            |
|----------------------------------------|--------------|--------------|--------------|--------------|--------------|------------|--------------|--------------|--------------|--------------|------------|------------|
|                                        | DHA          |              |              |              |              |            |              |              |              |              |            |            |
|                                        | CYPs         |              |              |              |              |            | SEH          |              |              |              |            |            |
| Group Info                             | Sample ID    | 19(20)-EpDPE | 16(17)-EpDPE | 13(14)-EpDPE | 10(11)-EpDPE | 7(8)-EpDPE | 19,20-DiHDPE | 16,17-DiHDPE | 13,14-DiHDPE | 10,11-DiHDPE | 7,8-DiHDPE | 4,5-DiHDPE |
| Murine Brown Pre-adipocytes            | 12h sample 1 | 0.750        | 0.063        | 0.057        | 0.096        | 2.883      | 1.637        | 0.140        | 0.069        | 0.393        | 0.065      | 0.733      |
|                                        | 12h sample 2 | 0.787        | 0.082        | 0.049        | 0.133        | 2.757      | 1.507        | 0.136        | 0.065        | 0.373        | 0.052      | 0.687      |
|                                        | 12h sample 3 | 0.847        | 0.076        | 0.113        | 0.164        | 2.940      | 1.557        | 0.152        | 0.060        | 0.393        | 0.030      | 0.703      |
|                                        | Ave          | 0.794        | 0.074        | 0.073        | 0.131        | 2.860      | 1.567        | 0.143        | 0.065        | 0.387        | 0.049      | 0.708      |
|                                        | SE           | 0.028        | 0.006        | 0.020        | 0.020        | 0.054      | 0.038        | 0.005        | 0.003        | 0.007        | 0.010      | 0.014      |
|                                        | 24h sample 1 | 0.460        | 0.061        | 0.065        | 0.079        | 2.087      | 2.623        | 0.196        | 0.088        | 0.320        | 0.088      | 0.593      |
|                                        | 24h sample 2 | 0.420        | 0.040        | 0.051        | 0.075        | 0.830      | 2.427        | 0.199        | 0.086        | 0.295        | 0.048      | 0.603      |
|                                        | 24h sample 3 | 0.370        | 0.036        | 0.045        | 0.085        | 1.873      | 2.533        | 0.175        | 0.097        | 0.330        | 0.064      | 0.667      |
|                                        | Ave          | 0.417        | 0.046        | 0.054        | 0.080        | 1.597      | 2.528        | 0.190        | 0.090        | 0.315        | 0.067      | 0.621      |
|                                        | SE           | 0.026        | 0.008        | 0.006        | 0.003        | 0.388      | 0.057        | 0.008        | 0.004        | 0.010        | 0.012      | 0.023      |
|                                        | 48h sample 1 | 0.357        | 0.050        | 0.037        | 0.113        | 1.090      | 6.700        | 0.329        | 0.150        | 0.240        | 0.095      | 0.407      |
|                                        | 48h sample 2 | 0.350        | 0.059        | 0.029        | 0.074        | 2.237      | 6.367        | 0.317        | 0.123        | 0.233        | 0.088      | 0.333      |
|                                        | 48h sample 3 | 0.483        | 0.086        | 0.086        | 0.119        | 2.597      | 6.133        | 0.291        | 0.115        | 0.209        | 0.082      | 0.443      |
|                                        | Ave          | 0.397        | 0.065        | 0.051        | 0.102        | 1.974      | 6.400        | 0.312        | 0.129        | 0.227        | 0.089      | 0.394      |
|                                        | SE           | 0.043        | 0.011        | 0.018        | 0.014        | 0.454      | 0.164        | 0.011        | 0.011        | 0.009        | 0.004      | 0.032      |
| Murine Differentiated Brown Adipocytes | 12h sample 1 | 1.053        | 0.097        | 0.110        | 0.193        | 3.313      | 2.657        | 0.197        | 0.110        | 0.420        | 0.093      | 1.117      |
|                                        | 12h sample 2 | 1.077        | 0.188        | 0.138        | 0.251        | 4.433      | 2.590        | 0.189        | 0.113        | 0.473        | 0.111      | 1.157      |
|                                        | 12h sample 3 | 0.927        | 0.104        | 0.081        | 0.152        | 3.237      | 2.383        | 0.190        | 0.108        | 0.457        | 0.064      | 1.073      |
|                                        | Ave          | 1.019        | 0.130        | 0.110        | 0.199        | 3.661      | 2.543        | 0.192        | 0.110        | 0.450        | 0.089      | 1.116      |
|                                        | SE           | 0.047        | 0.029        | 0.016        | 0.029        | 0.387      | 0.082        | 0.003        | 0.001        | 0.016        | 0.014      | 0.024      |
|                                        | 24h sample 1 | 0.537        | 0.087        | 0.076        | 0.193        | 4.100      | 4.200        | 0.222        | 0.146        | 0.367        | 0.147      | 1.313      |
|                                        | 24h sample 2 | 0.657        | 0.086        | 0.086        | 0.161        | 3.007      | 3.700        | 0.228        | 0.130        | 0.393        | 0.149      | 1.257      |
|                                        | 24h sample 3 | 0.710        | 0.153        | 0.168        | 0.251        | 7.333      | 3.433        | 0.207        | 0.134        | 0.304        | 0.143      | 1.393      |
|                                        | Ave          | 0.634        | 0.109        | 0.110        | 0.202        | 4.813      | 3.778        | 0.219        | 0.137        | 0.355        | 0.146      | 1.321      |
|                                        | SE           | 0.051        | 0.022        | 0.029        | 0.026        | 1.299      | 0.225        | 0.006        | 0.005        | 0.026        | 0.002      | 0.040      |
|                                        | 48h sample 1 | 1.063        | 0.165        | 0.186        | 0.316        | 8.033      | 8.067        | 0.400        | 0.292        | 0.470        | 0.192      | 2.953      |
|                                        | 48h sample 2 | 0.477        | 0.089        | 0.112        | 0.163        | 3.367      | 6.033        | 0.291        | 0.179        | 0.313        | 0.105      | 2.083      |
|                                        | 48h sample 3 | 0.783        | 0.151        | 0.117        | 0.185        | 4.933      | 6.000        | 0.283        | 0.181        | 0.324        | 0.117      | 2.257      |
|                                        | Ave          | 0.774        | 0.135        | 0.139        | 0.221        | 5.444      | 6.700        | 0.325        | 0.217        | 0.369        | 0.138      | 2.431      |
|                                        | SE           | 0.169        | 0.023        | 0.024        | 0.048        | 1.371      | 0.683        | 0.038        | 0.037        | 0.050        | 0.027      | 0.266      |
| Human Brown Pre-adipocytes             | 12h sample 1 | 0.547        | 0.089        | 0.124        | 0.263        | 4.767      | 0.617        | 0.096        | 0.047        | 0.200        | 0.092      | 0.763      |
|                                        | 12h sample 2 | 0.610        | 0.113        | 0.092        | 0.209        | 3.103      | 0.537        | 0.090        | 0.049        | 0.188        | 0.130      | 0.663      |
|                                        | 12h sample 3 | 0.657        | 0.090        | 0.094        | 0.209        | 3.000      | 0.560        | 0.073        | 0.047        | 0.231        | 0.103      | 0.700      |
|                                        | Ave          | 0.604        | 0.097        | 0.103        | 0.227        | 3.623      | 0.571        | 0.086        | 0.048        | 0.206        | 0.108      | 0.709      |
|                                        | SE           | 0.032        | 0.008        | 0.010        | 0.018        | 0.572      | 0.024        | 0.007        | 0.001        | 0.013        | 0.012      | 0.029      |
|                                        | 24h sample 1 | 0.251        | 0.080        | 0.061        | 0.151        | 2.523      | 0.617        | 0.090        | 0.043        | 0.203        | 0.125      | 0.933      |
|                                        | 24h sample 2 | 0.267        | 0.081        | 0.089        | 0.131        | 3.217      | 0.557        | 0.084        | 0.052        | 0.167        | 0.051      | 0.733      |
|                                        | 24h sample 3 | 0.274        | 0.074        | 0.068        | 0.157        | 3.433      | 0.600        | 0.082        | 0.054        | 0.193        | 0.072      | 0.610      |
|                                        | Ave          | 0.264        | 0.078        | 0.073        | 0.146        | 3.058      | 0.591        | 0.085        | 0.050        | 0.188        | 0.083      | 0.759      |
|                                        | SE           | 0.007        | 0.002        | 0.008        | 0.008        | 0.274      | 0.018        | 0.002        | 0.003        | 0.011        | 0.022      | 0.094      |
|                                        | 48h sample 1 | 0.124        | 0.050        | 0.067        | 0.096        | 1.597      | 0.787        | 0.133        | 0.081        | 0.164        | 0.147      | 0.493      |
|                                        | 48h sample 2 | 0.093        | 0.024        | 0.049        | 0.068        | 1.233      | 0.727        | 0.147        | 0.072        | 0.157        | 0.058      | 0.573      |
|                                        | 48h sample 3 | 0.103        | 0.033        | 0.030        | 0.082        | 0.810      | 0.683        | 0.135        | 0.074        | 0.150        | 0.060      | 0.447      |
|                                        | Ave          | 0.107        | 0.036        | 0.049        | 0.082        | 1.213      | 0.732        | 0.138        | 0.076        | 0.157        | 0.089      | 0.504      |
|                                        | SE           | 0.009        | 0.008        | 0.011        | 0.008        | 0.227      | 0.030        | 0.004        | 0.003        | 0.004        | 0.029      | 0.037      |
| Human Differentiated Brown Adipocytes  | 12h sample 1 | 0.104        | 0.045        | 0.025        | 0.085        | 0.590      | 0.590        | 0.096        | 0.053        | 0.058        | 0.069      | 0.277      |
|                                        | 12h sample 2 | 0.074        | 0.034        | 0.028        | 0.066        | 1.810      | 0.557        | 0.067        | 0.045        | 0.050        | 0.085      | 0.353      |
|                                        | 12h sample 3 | 0.079        | 0.017        | 0.007        | 0.053        | 1.543      | 0.557        | 0.061        | 0.037        | 0.038        | 0.070      | 0.337      |
|                                        | Ave          | 0.086        | 0.032        | 0.020        | 0.068        | 1.314      | 0.568        | 0.075        | 0.045        | 0.049        | 0.075      | 0.322      |
|                                        | SE           | 0.009        | 0.008        | 0.006        | 0.009        | 0.370      | 0.011        | 0.011        | 0.005        | 0.006        | 0.005      | 0.023      |
|                                        | 24h sample 1 | 0.156        | 0.043        | 0.051        | 0.105        | 1.210      | 0.733        | 0.074        | 0.049        | 0.086        | 0.118      | 0.269      |
|                                        | 24h sample 2 | 0.143        | 0.049        | 0.062        | 0.116        | 0.750      | 0.760        | 0.098        | 0.070        | 0.091        | 0.167      | 0.370      |
|                                        | 24h sample 3 | 0.202        | 0.062        | 0.086        | 0.107        | 1.723      | 0.780        | 0.103        | 0.066        | 0.084        | 0.168      | 0.407      |
|                                        | Ave          | 0.167        | 0.052        | 0.066        | 0.109        | 1.228      | 0.758        | 0.092        | 0.062        | 0.087        | 0.151      | 0.349      |
|                                        | SE           | 0.018        | 0.006        | 0.010        | 0.003        | 0.281      | 0.014        | 0.009        | 0.006        | 0.002        | 0.016      | 0.041      |
|                                        | 48h sample 1 | 0.157        | 0.039        | 0.037        | 0.105        | 1.107      | 0.667        | 0.108        | 0.053        | 0.100        | 0.066      | 0.527      |
|                                        | 48h sample 2 | 0.211        | 0.035        | 0.051        | 0.105        | 1.820      | 0.653        | 0.092        | 0.051        | 0.110        | 0.117      | 0.473      |
|                                        | 48h sample 3 | 0.100        | 0.055        | 0.042        | 0.069        | 1.160      | 0.637        | 0.091        | 0.043        | 0.099        | 0.141      | 0.322      |
|                                        | Ave          | 0.156        | 0.043        | 0.043        | 0.093        | 1.362      | 0.652        | 0.097        | 0.049        | 0.103        | 0.108      | 0.441      |
|                                        | SE           | 0.032        | 0.006        | 0.004        | 0.012        | 0.229      | 0.009        | 0.006        | 0.003        | 0.004        | 0.022      | 0.061      |
